# Supplementary material for: Integrated bioinformatics analysis and experimental validation reveal ISG20 as a novel prognostic indicator expressed on M2 macrophage in glioma
Source: BMC Cancer. 2023 Jun 28;23:596. doi: 10.1186/s12885-023-11057-0 (PMC10303331; doi:10.1186/s12885-023-11057-0)
Supplement: Supplementary file 7 — Additional file 7. Table S7 [file 12885_2023_11057_MOESM7_ESM.xlsx]

## Sheet: _FINAL_GO
Table S7. Significant enriched terms of molecular function by the differential expressed genes between ISG20 low and high subgroups
GO terms	Description	Log10 P-value	Enrichment	Z-score	Log10 q-value
GO:0022836	gated channel activity	-41.7482	4.06199	17.4351	-38.0632
GO:0005216	ion channel activity	-41.1581	3.59724	16.8907	-37.826
GO:0015267	channel activity	-41.0242	3.44136	16.713	-37.826
GO:0022803	passive transmembrane transporter activity	-40.9089	3.43434	16.6822	-37.826
GO:0005509	calcium ion binding	-35.0396	2.77951	14.7764	-32.0536
GO:0005261	cation channel activity	-34.3527	3.70036	15.49	-31.4458
GO:0015318	inorganic molecular entity transmembrane transporter activity	-32.6948	2.6868	14.1665	-29.8549
GO:0046873	metal ion transmembrane transporter activity	-28.1186	3.10385	13.4923	-25.3366
GO:0022890	inorganic cation transmembrane transporter activity	-27.6522	2.72959	13.0393	-24.9214
GO:0005244	voltage-gated ion channel activity	-26.1822	4.15726	13.7906	-23.5386
GO:0022832	voltage-gated channel activity	-26.1822	4.15726	13.7906	-23.5386
GO:0008324	cation transmembrane transporter activity	-25.8032	2.58105	12.4436	-23.1974
GO:0022843	voltage-gated cation channel activity	-24.2521	4.67451	13.572	-21.681
GO:0015276	ligand-gated ion channel activity	-23.2131	4.56224	13.2031	-20.7042
GO:0022834	ligand-gated channel activity	-23.2131	4.56224	13.2031	-20.7042
GO:0005201	extracellular matrix structural constituent	-21.2528	4.0485	12.3116	-18.7719
GO:0030594	neurotransmitter receptor activity	-20.8821	4.91412	12.6858	-18.4276
GO:0140375	immune receptor activity	-18.6736	4.07767	11.5251	-16.2438
GO:0015079	potassium ion transmembrane transporter activity	-18.2677	3.94296	11.316	-15.8614
GO:0005267	potassium channel activity	-18.0125	4.37592	11.4729	-15.6285
GO:0099094	ligand-gated cation channel activity	-16.7266	4.33952	11.0175	-14.3638
GO:0008289	lipid binding	-16.6936	2.08233	9.50864	-14.351
GO:0005249	voltage-gated potassium channel activity	-16.5783	4.79365	11.1902	-14.2551
GO:0030546	signaling receptor activator activity	-16.5026	2.41005	9.7229	-14.2002
GO:0048018	receptor ligand activity	-16.4873	2.42082	9.72661	-14.2002
GO:0098960	postsynaptic neurotransmitter receptor activity	-16.06	5.62151	11.3647	-13.79
GO:0005539	glycosaminoglycan binding	-15.6486	3.09813	9.93608	-13.3949
GO:0042277	peptide binding	-15.386	2.73075	9.60272	-13.163
GO:0030545	signaling receptor regulator activity	-15.3856	2.28274	9.2706	-13.163
GO:0022824	transmitter-gated ion channel activity	-15.0361	5.60942	10.9743	-12.8424
GO:0022835	transmitter-gated channel activity	-15.0361	5.60942	10.9743	-12.8424
GO:0005230	extracellular ligand-gated ion channel activity	-14.9733	5.08742	10.7364	-12.7934
GO:0008528	G protein-coupled peptide receptor activity	-14.8549	3.66085	9.99797	-12.6884
GO:0019838	growth factor binding	-14.2128	3.78064	9.8312	-12.0593
GO:0001653	peptide receptor activity	-14.1199	3.51914	9.65516	-11.979
GO:0030246	carbohydrate binding	-13.7629	2.79396	9.09219	-11.6342
GO:0008201	heparin binding	-13.7307	3.34517	9.4156	-11.6139
GO:0033218	amide binding	-13.6736	2.41905	8.80626	-11.5683
GO:0005178	integrin binding	-13.3359	3.42219	9.31362	-11.242
GO:0042803	protein homodimerization activity	-13.2819	2.03015	8.38061	-11.199
GO:0099529	neurotransmitter receptor activity involved in regulation of postsynaptic membrane potential	-12.7214	5.68442	10.077	-10.6491
GO:0005543	phospholipid binding	-12.5116	2.23664	8.27009	-10.4498
GO:0015085	calcium ion transmembrane transporter activity	-12.4366	3.52469	9.02758	-10.385
GO:0050839	cell adhesion molecule binding	-12.244	2.10444	8.07861	-10.2025
GO:0005125	cytokine activity	-11.7649	2.76561	8.34351	-9.73304
GO:0005518	collagen binding	-11.4931	4.60814	9.14641	-9.47084
GO:1904315	transmitter-gated ion channel activity involved in regulation of postsynaptic membrane potential	-11.4487	5.55055	9.48412	-9.43964
GO:0001540	amyloid-beta binding	-11.4434	4.19483	8.94968	-9.43964
GO:0001786	phosphatidylserine binding	-10.3724	4.64228	8.67169	-8.37758
GO:0008066	glutamate receptor activity	-10.3389	6.87744	9.38184	-8.35288
GO:0005262	calcium channel activity	-10.2872	3.41344	8.1001	-8.30972
GO:0004857	enzyme inhibitor activity	-10.0826	2.2021	7.33704	-8.11355
GO:0003779	actin binding	-9.94653	2.11493	7.22577	-7.98578
GO:0023023	MHC protein complex binding	-9.88958	5.80284	8.85385	-7.93695
GO:1901681	sulfur compound binding	-9.79637	2.4592	7.3817	-7.8517
GO:0005516	calmodulin binding	-9.77205	2.72734	7.5259	-7.83522
GO:0019900	kinase binding	-9.52474	1.79128	6.83434	-7.59559
GO:0005198	structural molecule activity	-9.23709	1.80784	6.73203	-7.3155
GO:0023026	MHC class II protein complex binding	-9.18171	6.4476	8.69571	-7.26753
GO:0019955	cytokine binding	-9.1696	3.02402	7.42344	-7.26272
GO:0001968	fibronectin binding	-9.12175	5.99003	8.53553	-7.22206
GO:0032395	MHC class II receptor activity	-8.62248	10.4451	9.17282	-6.72984
GO:0016917	GABA receptor activity	-8.47974	6.85791	8.43986	-6.59406
GO:0004970	ionotropic glutamate receptor activity	-8.33427	7.32991	8.47489	-6.45542
GO:0008236	serine-type peptidase activity	-8.32215	2.59919	6.82589	-6.45004
GO:0044325	transmembrane transporter binding	-8.22302	3.01565	6.98966	-6.35754
GO:0017171	serine hydrolase activity	-8.03771	2.54615	6.66831	-6.17876
GO:0072341	modified amino acid binding	-7.96289	3.36939	7.02703	-6.11037
GO:0015081	sodium ion transmembrane transporter activity	-7.90948	2.78537	6.73097	-6.06331
GO:0005272	sodium channel activity	-7.76268	4.54136	7.38079	-5.92276
GO:0050840	extracellular matrix binding	-7.75158	4.14489	7.23312	-5.91781
GO:0061134	peptidase regulator activity	-7.6838	2.3716	6.41171	-5.85611
GO:0019904	protein domain specific binding	-7.66192	1.74001	6.0247	-5.84022
GO:0004896	cytokine receptor activity	-7.53356	3.23045	6.75616	-5.71777
GO:0008083	growth factor activity	-7.49736	2.65068	6.46863	-5.68739
GO:0001228	DNA-binding transcription activator activity, RNA polymerase II-specific	-7.46961	1.90916	6.0469	-5.6654
GO:0000149	SNARE binding	-7.46243	3.05968	6.64526	-5.66389
GO:0002020	protease binding	-7.43279	2.81609	6.51793	-5.63986
GO:0005126	cytokine receptor binding	-7.40887	2.21873	6.19986	-5.62147
GO:0016247	channel regulator activity	-7.40172	2.75939	6.47568	-5.61978
GO:0001216	DNA-binding transcription activator activity	-7.30964	1.89277	5.96396	-5.5331
GO:0016301	kinase activity	-7.13882	1.68521	5.75469	-5.36761
GO:0004252	serine-type endopeptidase activity	-7.13118	2.53458	6.23363	-5.36524
GO:0004890	GABA-A receptor activity	-7.12547	6.71908	7.65708	-5.36473
GO:0004672	protein kinase activity	-7.09336	1.78707	5.79913	-5.33776
GO:1901981	phosphatidylinositol phosphate binding	-7.06214	2.52009	6.19262	-5.31162
GO:0030020	extracellular matrix structural constituent conferring tensile strength	-6.9494	4.52905	6.94333	-5.20734
GO:0035091	phosphatidylinositol binding	-6.94789	2.1681	5.95326	-5.20734
GO:0022851	GABA-gated chloride ion channel activity	-6.87281	8.03471	7.78995	-5.13718
GO:0099106	ion channel regulator activity	-6.73945	2.69117	6.11429	-5.01303
GO:0030414	peptidase inhibitor activity	-6.73901	2.42044	5.98295	-5.01303
GO:0004866	endopeptidase inhibitor activity	-6.72697	2.45009	5.99174	-5.00573
GO:0008509	anion transmembrane transporter activity	-6.70761	2.05022	5.77196	-4.99107
GO:0019956	chemokine binding	-6.69192	4.92363	6.92477	-4.98002
GO:0070851	growth factor receptor binding	-6.66293	2.67181	6.06625	-4.95563
GO:0001618	virus receptor activity	-6.5888	3.35954	6.32419	-4.88605
GO:1902936	phosphatidylinositol bisphosphate binding	-6.57405	2.92854	6.13641	-4.8758
GO:0005544	calcium-dependent phospholipid binding	-6.51784	3.86856	6.47848	-4.82404
GO:0019901	protein kinase binding	-6.49408	1.66758	5.44313	-4.80469
GO:0140272	exogenous protein binding	-6.47936	3.31591	6.24806	-4.79434
GO:0004712	protein serine/threonine/tyrosine kinase activity	-6.46276	1.84754	5.53711	-4.78206
GO:0061135	endopeptidase regulator activity	-6.30545	2.3331	5.71988	-4.62902
GO:0099095	ligand-gated anion channel activity	-6.29418	6.4476	7.09896	-4.62199
GO:0005254	chloride channel activity	-6.1608	3.29351	6.06557	-4.4928
GO:0016773	phosphotransferase activity, alcohol group as acceptor	-6.14473	1.65304	5.26492	-4.4809
GO:0035254	glutamate receptor binding	-6.12548	4.24598	6.38641	-4.46576
GO:0005253	anion channel activity	-6.08189	3.06817	5.93193	-4.42625
GO:0098918	structural constituent of synapse	-6.00475	6.10826	6.83927	-4.35315
GO:0008081	phosphoric diester hydrolase activity	-5.98703	3.0333	5.86544	-4.33943
GO:0005546	phosphatidylinositol-4,5-bisphosphate binding	-5.96407	3.11372	5.8853	-4.32044
GO:0008017	microtubule binding	-5.83638	2.04806	5.33163	-4.19668
GO:0005248	voltage-gated sodium channel activity	-5.78346	5.31927	6.49999	-4.14765
GO:0004175	endopeptidase activity	-5.69488	1.7958	5.12162	-4.06294
GO:0005245	voltage-gated calcium channel activity	-5.67427	3.95648	6.02618	-4.04615
GO:0015108	chloride transmembrane transporter activity	-5.58428	2.8135	5.54973	-3.95996
GO:0001530	lipopolysaccharide binding	-5.47257	4.31068	6.01765	-3.852
GO:0001637	G protein-coupled chemoattractant receptor activity	-5.36333	4.9101	6.1247	-3.75019
GO:0004950	chemokine receptor activity	-5.36333	4.9101	6.1247	-3.75019
GO:0043394	proteoglycan binding	-5.31366	4.19094	5.88237	-3.70781
GO:0042605	peptide antigen binding	-5.31366	4.19094	5.88237	-3.70781
GO:0019905	syntaxin binding	-5.22081	3.10575	5.45469	-3.61857
GO:0008233	peptidase activity	-5.19802	1.62251	4.76141	-3.59936
GO:0008047	enzyme activator activity	-5.19389	1.65496	4.77766	-3.59877
GO:0005242	inward rectifier potassium channel activity	-5.17133	4.72824	5.95119	-3.57973
GO:0008503	benzodiazepine receptor activity	-5.07294	7.38544	6.50413	-3.49172
GO:0048407	platelet-derived growth factor binding	-5.07294	7.38544	6.50413	-3.49172
GO:0019864	IgG binding	-5.07294	7.38544	6.50413	-3.49172
GO:0016493	C-C chemokine receptor activity	-5.05195	5.04595	5.96037	-3.47413
GO:0042578	phosphoric ester hydrolase activity	-4.99604	1.80252	4.7497	-3.4216
GO:0004629	phospholipase C activity	-4.98984	4.55938	5.78599	-3.41876
GO:0005251	delayed rectifier potassium channel activity	-4.98461	4.22025	5.68339	-3.41685
GO:0005520	insulin-like growth factor binding	-4.96999	5.49743	6.02145	-3.40554
GO:0005237	inhibitory extracellular ligand-gated ion channel activity	-4.95385	6.1897	6.17333	-3.39268
GO:0022839	ion gated channel activity	-4.93899	3.69272	5.48855	-3.38107
GO:0004713	protein tyrosine kinase activity	-4.92066	2.38941	4.98657	-3.36596
GO:0019957	C-C chemokine binding	-4.85281	4.8357	5.77227	-3.30451
GO:0019865	immunoglobulin binding	-4.85281	4.8357	5.77227	-3.30451
GO:0043325	phosphatidylinositol-3,4-bisphosphate binding	-4.81791	4.40216	5.62841	-3.27277
GO:0001664	G protein-coupled receptor binding	-4.79168	1.89398	4.68091	-3.24967
GO:0016638	oxidoreductase activity, acting on the CH-NH2 group of donors	-4.74498	5.22256	5.8004	-3.20608
GO:0035325	Toll-like receptor binding	-4.72651	6.76998	6.13868	-3.1907
GO:0098631	cell adhesion mediator activity	-4.6907	3.08276	5.12169	-3.15797
GO:0086008	voltage-gated potassium channel activity involved in cardiac muscle cell action potential repolarization	-4.68706	5.80284	5.90061	-3.15737
GO:0015631	tubulin binding	-4.68252	1.75937	4.54981	-3.15586
GO:0031406	carboxylic acid binding	-4.52711	2.14672	4.64462	-3.00345
GO:0004435	phosphatidylinositol phospholipase C activity	-4.48992	4.46373	5.42551	-2.96924
GO:0048306	calcium-dependent protein binding	-4.47928	2.699	4.8449	-2.96157
GO:0005035	death receptor activity	-4.42444	6.24922	5.81277	-2.90968
GO:0097110	scaffold protein binding	-4.4108	2.94473	4.8933	-2.89896
GO:0019207	kinase regulator activity	-4.387	1.93428	4.4621	-2.87807
GO:0008009	chemokine activity	-4.34862	3.31591	4.98191	-2.84257
GO:0035255	ionotropic glutamate receptor binding	-4.34261	4.74778	5.39967	-2.84228
GO:0015464	acetylcholine receptor activity	-4.34261	4.74778	5.39967	-2.84228
GO:0016286	small conductance calcium-activated potassium channel activity	-4.2596	11.6057	6.5136	-2.7621
GO:0005031	tumor necrosis factor receptor activity	-4.20075	6.96341	5.79149	-2.71162
GO:0099528	G protein-coupled neurotransmitter receptor activity	-4.20075	6.96341	5.79149	-2.71162
GO:0042608	T cell receptor binding	-4.20075	6.96341	5.79149	-2.71162
GO:0003953	NAD+ nucleosidase activity	-4.1668	4.14489	5.11221	-2.68044
GO:0015271	outward rectifier potassium channel activity	-4.15709	5.80284	5.51933	-2.67619
GO:0005161	platelet-derived growth factor receptor binding	-4.15709	5.80284	5.51933	-2.67619
GO:0004993	G protein-coupled serotonin receptor activity	-4.07603	3.75478	4.93508	-2.60052
GO:0099589	serotonin receptor activity	-4.07603	3.75478	4.93508	-2.60052
GO:0015103	inorganic anion transmembrane transporter activity	-4.06218	2.15205	4.35784	-2.58934
GO:0001217	DNA-binding transcription repressor activity	-4.05923	1.74978	4.17301	-2.58904
GO:0051015	actin filament binding	-4.05644	1.94328	4.2622	-2.5889
GO:0008188	neuropeptide receptor activity	-4.0253	3.27987	4.75164	-2.56038
GO:0005326	neurotransmitter transmembrane transporter activity	-4.02071	4.88661	5.20364	-2.5584
GO:0005231	excitatory extracellular ligand-gated ion channel activity	-4.01796	4.00196	4.96634	-2.55824
GO:0016702	oxidoreductase activity, acting on single donors with incorporation of molecular oxygen, incorporation of two atoms of oxygen	-3.99191	4.35213	5.04456	-2.53477
GO:0015298	solute:cation antiporter activity	-3.94721	3.6475	4.81222	-2.49263
GO:0015026	coreceptor activity	-3.92011	3.21008	4.65607	-2.46808
GO:0015459	potassium channel regulator activity	-3.84489	3.00888	4.53694	-2.3954
GO:0016701	oxidoreductase activity, acting on single donors with incorporation of molecular oxygen	-3.83254	4.17805	4.88128	-2.38806
GO:0030247	polysaccharide binding	-3.83254	4.17805	4.88128	-2.38806
GO:0016814	hydrolase activity, acting on carbon-nitrogen (but not peptide) bonds, in cyclic amidines	-3.82386	3.54618	4.69378	-2.38187
GO:0005507	copper ion binding	-3.79681	2.85386	4.45045	-2.3573
GO:0043177	organic acid binding	-3.77682	2.14006	4.16654	-2.33977
GO:0106310	protein serine kinase activity	-3.75428	1.67173	3.94262	-2.31968
GO:0003774	cytoskeletal motor activity	-3.75094	2.30023	4.21409	-2.31877
GO:0004725	protein tyrosine phosphatase activity	-3.70538	2.39293	4.21925	-2.27647
GO:0005283	amino acid:sodium symporter activity	-3.70142	5.07749	5.00946	-2.27647
GO:0015172	acidic amino acid transmembrane transporter activity	-3.70142	5.07749	5.00946	-2.27647
GO:0004222	metalloendopeptidase activity	-3.69231	2.27969	4.16623	-2.26973
GO:0015291	secondary active transmembrane transporter activity	-3.68594	1.82994	3.9721	-2.26573
GO:0004972	NMDA glutamate receptor activity	-3.67338	7.25355	5.43191	-2.26251
GO:0030881	beta-2-microglobulin binding	-3.67338	7.25355	5.43191	-2.26251
GO:0046977	TAP binding	-3.67338	7.25355	5.43191	-2.26251
GO:0031995	insulin-like growth factor II binding	-3.67338	7.25355	5.43191	-2.26251
GO:0004867	serine-type endopeptidase inhibitor activity	-3.64243	2.36851	4.16667	-2.23387
GO:0015293	symporter activity	-3.62507	2.09547	4.04617	-2.22044
GO:0016799	hydrolase activity, hydrolyzing N-glycosyl compounds	-3.62443	3.01748	4.38407	-2.22044
GO:0001227	DNA-binding transcription repressor activity, RNA polymerase II-specific	-3.61875	1.69928	3.86763	-2.21703
GO:0042923	neuropeptide binding	-3.61421	3.62678	4.56512	-2.21474
GO:0022849	glutamate-gated calcium ion channel activity	-3.5916	9.28455	5.6887	-2.20104
GO:0070891	lipoteichoic acid binding	-3.5916	9.28455	5.6887	-2.20104
GO:0004720	protein-lysine 6-oxidase activity	-3.5916	9.28455	5.6887	-2.20104
GO:0004994	somatostatin receptor activity	-3.5916	9.28455	5.6887	-2.20104
GO:0008237	metallopeptidase activity	-3.58839	1.94474	3.95781	-2.20004
GO:0042379	chemokine receptor binding	-3.53743	2.61537	4.18441	-2.15126
GO:0019209	kinase activator activity	-3.5219	2.22022	4.02567	-2.1379
GO:0050811	GABA receptor binding	-3.50451	4.77881	4.78548	-2.12402
GO:0019887	protein kinase regulator activity	-3.5037	1.86129	3.8643	-2.12402
GO:0005416	amino acid:cation symporter activity	-3.4964	4.22025	4.63962	-2.12101
GO:0030021	extracellular matrix structural constituent conferring compression resistance	-3.4964	4.22025	4.63962	-2.12101
GO:0019239	deaminase activity	-3.49209	3.51688	4.44201	-2.11882
GO:0030295	protein kinase activator activity	-3.43269	2.23596	3.96941	-2.06153
GO:0030674	protein-macromolecule adaptor activity	-3.40913	1.6847	3.72086	-2.04008
GO:0043236	laminin binding	-3.40666	3.7304	4.43844	-2.0397
GO:0017124	SH3 domain binding	-3.39883	2.13545	3.90612	-2.03395
GO:0099186	structural constituent of postsynapse	-3.38732	5.35647	4.82418	-2.02863
GO:0031994	insulin-like growth factor I binding	-3.38732	5.35647	4.82418	-2.02863
GO:1902282	voltage-gated potassium channel activity involved in ventricular cardiac muscle cell action potential repolarization	-3.38732	5.35647	4.82418	-2.02863
GO:0030023	extracellular matrix constituent conferring elasticity	-3.35327	6.4476	5.01897	-1.99739
GO:0004674	protein serine/threonine kinase activity	-3.352	1.56542	3.62612	-1.99739
GO:0045236	CXCR chemokine receptor binding	-3.32411	4.51332	4.57833	-1.97152
GO:0003777	microtubule motor activity	-3.32028	2.59829	4.02159	-1.96971
GO:0005044	scavenger receptor activity	-3.3101	2.96315	4.13585	-1.96153
GO:0005506	iron ion binding	-3.29327	1.99833	3.77637	-1.9467
GO:0098632	cell-cell adhesion mediator activity	-3.2711	2.79396	4.05156	-1.92652
GO:0099184	structural constituent of postsynaptic intermediate filament cytoskeleton	-3.19447	11.6057	5.64085	-1.86355
GO:0019770	IgG receptor activity	-3.19447	11.6057	5.64085	-1.86355
GO:0099508	voltage-gated ion channel activity involved in regulation of presynaptic membrane potential	-3.19447	11.6057	5.64085	-1.86355
GO:0099583	neurotransmitter receptor activity involved in regulation of postsynaptic cytosolic calcium ion concentration	-3.19447	11.6057	5.64085	-1.86355
GO:0004911	interleukin-2 receptor activity	-3.19447	11.6057	5.64085	-1.86355
GO:0019976	interleukin-2 binding	-3.19447	11.6057	5.64085	-1.86355
GO:0001730	2'-5'-oligoadenylate synthetase activity	-3.19447	11.6057	5.64085	-1.86355
GO:0005313	L-glutamate transmembrane transporter activity	-3.17712	4.97387	4.56669	-1.84963
GO:0030276	clathrin binding	-3.17672	2.52298	3.889	-1.84963
GO:0004653	polypeptide N-acetylgalactosaminyltransferase activity	-3.15797	4.27578	4.38583	-1.83389
GO:0042805	actinin binding	-3.15719	3.2238	4.09949	-1.83389
GO:0070888	E-box binding	-3.13327	2.84221	3.9629	-1.81186
GO:0050786	RAGE receptor binding	-3.08424	5.80284	4.66438	-1.77213
GO:0005432	calcium:sodium antiporter activity	-3.08424	5.80284	4.66438	-1.77213
GO:0047844	deoxycytidine deaminase activity	-3.08424	5.80284	4.66438	-1.77213
GO:0008330	protein tyrosine/threonine phosphatase activity	-3.08424	5.80284	4.66438	-1.77213
GO:0004955	prostaglandin receptor activity	-3.08424	5.80284	4.66438	-1.77213
GO:0015171	amino acid transmembrane transporter activity	-3.08067	2.32114	3.74535	-1.7704
GO:0017075	syntaxin-1 binding	-3.00426	4.06199	4.20616	-1.69581
GO:0019199	transmembrane receptor protein kinase activity	-2.99453	2.35052	3.69068	-1.68972
GO:0038024	cargo receptor activity	-2.99453	2.35052	3.69068	-1.68972
GO:0097153	cysteine-type endopeptidase activity involved in apoptotic process	-2.98805	4.64228	4.33261	-1.68684
GO:0030553	cGMP binding	-2.98805	4.64228	4.33261	-1.68684
GO:0008227	G protein-coupled amine receptor activity	-2.96758	2.73075	3.79848	-1.66816
GO:0042562	hormone binding	-2.96208	2.26778	3.63624	-1.66445
GO:0099604	ligand-gated calcium channel activity	-2.94303	3.57098	4.02713	-1.64717
GO:0005154	epidermal growth factor receptor binding	-2.93502	3.2641	3.93481	-1.64093
GO:0022853	active ion transmembrane transporter activity	-2.87762	1.66421	3.33478	-1.5853
GO:0032052	bile acid binding	-2.85293	5.27531	4.35479	-1.56758
GO:0015368	calcium:cation antiporter activity	-2.85293	5.27531	4.35479	-1.56758
GO:0097493	structural molecule activity conferring elasticity	-2.85293	5.27531	4.35479	-1.56758
GO:0004954	prostanoid receptor activity	-2.85293	5.27531	4.35479	-1.56758
GO:0043178	alcohol binding	-2.8482	2.21682	3.53008	-1.56458
GO:0016641	oxidoreductase activity, acting on the CH-NH2 group of donors, oxygen as acceptor	-2.81664	4.35213	4.11832	-1.54638
GO:0022848	acetylcholine-gated cation-selective channel activity	-2.81664	4.35213	4.11832	-1.54638
GO:0050135	NAD(P)+ nucleosidase activity	-2.81664	4.35213	4.11832	-1.54638
GO:0061809	NAD+ nucleotidase, cyclic ADP-ribose generating	-2.81664	4.35213	4.11832	-1.54638
GO:0005523	tropomyosin binding	-2.81664	4.35213	4.11832	-1.54638
GO:0046935	1-phosphatidylinositol-3-kinase regulator activity	-2.81664	4.35213	4.11832	-1.54638
GO:0030165	PDZ domain binding	-2.81453	2.26452	3.52085	-1.54638
GO:0004714	transmembrane receptor protein tyrosine kinase activity	-2.81358	2.51457	3.60594	-1.54638
GO:0019763	immunoglobulin receptor activity	-2.80816	6.63182	4.57585	-1.54638
GO:0016907	G protein-coupled acetylcholine receptor activity	-2.80816	6.63182	4.57585	-1.54638
GO:0004908	interleukin-1 receptor activity	-2.80816	6.63182	4.57585	-1.54638
GO:0031727	CCR2 chemokine receptor binding	-2.80816	6.63182	4.57585	-1.54638
GO:0098634	cell-matrix adhesion mediator activity	-2.80816	6.63182	4.57585	-1.54638
GO:0004620	phospholipase activity	-2.77257	2.08026	3.42113	-1.51243
GO:0015179	L-amino acid transmembrane transporter activity	-2.74459	2.47334	3.53697	-1.48607
GO:0019903	protein phosphatase binding	-2.7179	1.882	3.30287	-1.46101
GO:0015491	cation:cation antiporter activity	-2.7118	3.31591	3.76466	-1.45974
GO:0051393	alpha-actinin binding	-2.7118	3.31591	3.76466	-1.45974
GO:0045499	chemorepellent activity	-2.7118	3.31591	3.76466	-1.45974
GO:0060090	molecular adaptor activity	-2.69662	1.51907	3.13505	-1.44617
GO:0019001	guanyl nucleotide binding	-2.69283	1.50498	3.12586	-1.44555
GO:0032561	guanyl ribonucleotide binding	-2.69283	1.50498	3.12586	-1.44555
GO:0042165	neurotransmitter binding	-2.66023	4.09613	3.92093	-1.42203
GO:0055102	lipase inhibitor activity	-2.66023	4.09613	3.92093	-1.42203
GO:0005149	interleukin-1 receptor binding	-2.66023	4.09613	3.92093	-1.42203
GO:0015269	calcium-activated potassium channel activity	-2.65069	4.8357	4.0808	-1.42203
GO:0051378	serotonin binding	-2.65069	4.8357	4.0808	-1.42203
GO:0004126	cytidine deaminase activity	-2.65069	4.8357	4.0808	-1.42203
GO:0005221	intracellular cyclic nucleotide activated cation channel activity	-2.65069	4.8357	4.0808	-1.42203
GO:0043855	cyclic nucleotide-gated ion channel activity	-2.65069	4.8357	4.0808	-1.42203
GO:0046790	virion binding	-2.65069	4.8357	4.0808	-1.42203
GO:0015280	ligand-gated sodium channel activity	-2.65069	4.8357	4.0808	-1.42203
GO:0005095	GTPase inhibitor activity	-2.65069	4.8357	4.0808	-1.42203
GO:0004875	complement receptor activity	-2.65069	4.8357	4.0808	-1.42203
GO:0019902	phosphatase binding	-2.63545	1.74386	3.18336	-1.40831
GO:0035662	Toll-like receptor 4 binding	-2.62139	8.70427	4.73166	-1.40471
GO:0005250	A-type (transient outward) potassium channel activity	-2.62139	8.70427	4.73166	-1.40471
GO:0099530	G protein-coupled receptor activity involved in regulation of postsynaptic membrane potential	-2.62139	8.70427	4.73166	-1.40471
GO:0004971	AMPA glutamate receptor activity	-2.62139	8.70427	4.73166	-1.40471
GO:0140135	mechanosensitive cation channel activity	-2.62139	8.70427	4.73166	-1.40471
GO:0070051	fibrinogen binding	-2.62139	8.70427	4.73166	-1.40471
GO:0001847	opsonin receptor activity	-2.62139	8.70427	4.73166	-1.40471
GO:0004869	cysteine-type endopeptidase inhibitor activity	-2.59587	2.48693	3.41989	-1.38067
GO:0016705	oxidoreductase activity, acting on paired donors, with incorporation or reduction of molecular oxygen	-2.58764	1.77036	3.15631	-1.37391
GO:0016798	hydrolase activity, acting on glycosyl bonds	-2.54277	1.85369	3.15312	-1.33051
GO:0016494	C-X-C chemokine receptor activity	-2.5378	5.80284	4.17181	-1.3299
GO:0042609	CD4 receptor binding	-2.5378	5.80284	4.17181	-1.3299
GO:0048495	Roundabout binding	-2.5378	5.80284	4.17181	-1.3299
GO:0016709	oxidoreductase activity, acting on paired donors, with incorporation or reduction of molecular oxygen, NAD(P)H as one donor, and incorporation of one atom of oxygen	-2.52068	2.699	3.42342	-1.31599
GO:0008022	protein C-terminus binding	-2.51786	1.75058	3.09269	-1.31599
GO:0017022	myosin binding	-2.51737	2.25666	3.27813	-1.31599
GO:0098641	cadherin binding involved in cell-cell adhesion	-2.51672	3.86856	3.73812	-1.31599
GO:0033549	MAP kinase phosphatase activity	-2.51672	3.86856	3.73812	-1.31599
GO:0005217	intracellular ligand-gated ion channel activity	-2.50424	3.09485	3.52495	-1.30635
GO:0017147	Wnt-protein binding	-2.50424	3.09485	3.52495	-1.30635
GO:0043176	amine binding	-2.4716	4.46373	3.83559	-1.27794
GO:0017017	MAP kinase tyrosine/serine/threonine phosphatase activity	-2.4716	4.46373	3.83559	-1.27794
GO:0004859	phospholipase inhibitor activity	-2.4716	4.46373	3.83559	-1.27794
GO:0046943	carboxylic acid transmembrane transporter activity	-2.43508	1.76916	3.0328	-1.24282
GO:0016298	lipase activity	-2.43011	1.87476	3.06919	-1.23924
GO:0020037	heme binding	-2.40809	1.83687	3.03663	-1.21861
GO:0005342	organic acid transmembrane transporter activity	-2.39991	1.75844	2.99968	-1.21181
GO:0035014	phosphatidylinositol 3-kinase regulator activity	-2.38442	3.66495	3.56801	-1.19771
GO:0005227	calcium activated cation channel activity	-2.37788	3.24959	3.45523	-1.19254
GO:0004715	non-membrane spanning protein tyrosine kinase activity	-2.36811	2.57904	3.25497	-1.18496
GO:0005096	GTPase activator activity	-2.36756	1.56719	2.89606	-1.18496
GO:0001640	adenylate cyclase inhibiting G protein-coupled glutamate receptor activity	-2.3131	5.15808	3.83092	-1.1396
GO:0098988	G protein-coupled glutamate receptor activity	-2.3131	5.15808	3.83092	-1.1396
GO:0003680	minor groove of adenine-thymine-rich DNA binding	-2.3131	5.15808	3.83092	-1.1396
GO:0019870	potassium channel inhibitor activity	-2.3131	5.15808	3.83092	-1.1396
GO:0046703	natural killer cell lectin-like receptor binding	-2.3131	5.15808	3.83092	-1.1396
GO:0071837	HMG box domain binding	-2.3114	4.14489	3.61404	-1.1396
GO:0044548	S100 protein binding	-2.3114	4.14489	3.61404	-1.1396
GO:0004089	carbonate dehydratase activity	-2.3114	4.14489	3.61404	-1.1396
GO:0019894	kinesin binding	-2.29587	2.52298	3.17414	-1.12583
GO:0005547	phosphatidylinositol-3,4,5-trisphosphate binding	-2.29498	2.67824	3.22025	-1.12583
GO:0030507	spectrin binding	-2.27471	3.12461	3.32794	-1.10688
GO:0031681	G-protein beta-subunit binding	-2.26197	3.48171	3.40904	-1.1013
GO:0001848	complement binding	-2.26197	3.48171	3.40904	-1.1013
GO:0008514	organic anion transmembrane transporter activity	-2.25502	1.67569	2.84603	-1.1013
GO:0005314	high-affinity glutamate transmembrane transporter activity	-2.2523	6.96341	4.09486	-1.1013
GO:0015501	glutamate:sodium symporter activity	-2.2523	6.96341	4.09486	-1.1013
GO:0048248	CXCR3 chemokine receptor binding	-2.2523	6.96341	4.09486	-1.1013
GO:0008273	calcium, potassium:sodium antiporter activity	-2.2523	6.96341	4.09486	-1.1013
GO:0004957	prostaglandin E receptor activity	-2.2523	6.96341	4.09486	-1.1013
GO:0004982	N-formyl peptide receptor activity	-2.2523	6.96341	4.09486	-1.1013
GO:0001851	complement component C3b binding	-2.2523	6.96341	4.09486	-1.1013
GO:0097109	neuroligin family protein binding	-2.2523	6.96341	4.09486	-1.1013
GO:0098882	structural constituent of presynaptic active zone	-2.2523	6.96341	4.09486	-1.1013
GO:0140311	protein sequestering activity	-2.2523	6.96341	4.09486	-1.1013
GO:0038187	pattern recognition receptor activity	-2.17737	3.00888	3.20667	-1.02764
GO:0004953	icosanoid receptor activity	-2.16691	3.86856	3.41225	-1.02347
GO:0001846	opsonin binding	-2.16691	3.86856	3.41225	-1.02347
GO:0050664	oxidoreductase activity, acting on NAD(P)H, oxygen as acceptor	-2.16691	3.86856	3.41225	-1.02347
GO:0031005	filamin binding	-2.16691	3.86856	3.41225	-1.02347
GO:0034483	heparan sulfate sulfotransferase activity	-2.16691	3.86856	3.41225	-1.02347
GO:0004497	monooxygenase activity	-2.16509	1.9155	2.85787	-1.02289
GO:0005243	gap junction channel activity	-2.14822	3.31591	3.25991	-1.00727
GO:0016595	glutamate binding	-2.12172	4.64228	3.53727	-0.989363
GO:0097199	cysteine-type endopeptidase activity involved in apoptotic signaling pathway	-2.12172	4.64228	3.53727	-0.989363
GO:0019869	chloride channel inhibitor activity	-2.12172	4.64228	3.53727	-0.989363
GO:0016175	superoxide-generating NAD(P)H oxidase activity	-2.12172	4.64228	3.53727	-0.989363
GO:0016176	superoxide-generating NADPH oxidase activator activity	-2.12172	4.64228	3.53727	-0.989363
GO:0043121	neurotrophin binding	-2.12172	4.64228	3.53727	-0.989363
GO:0035374	chondroitin sulfate binding	-2.12172	4.64228	3.53727	-0.989363
GO:1990782	protein tyrosine kinase binding	-2.09916	1.84869	2.77541	-0.968018
GO:0046906	tetrapyrrole binding	-2.04944	1.71359	2.68127	-0.919508
GO:0033293	monocarboxylic acid binding	-2.0473	2.00592	2.78364	-0.918581
GO:0043027	cysteine-type endopeptidase inhibitor activity involved in apoptotic process	-2.04223	3.16519	3.11953	-0.915916
GO:0030742	GTP-dependent protein binding	-2.04223	3.16519	3.11953	-0.915916
GO:0008191	metalloendopeptidase inhibitor activity	-2.03571	3.62678	3.22717	-0.911783
GO:0035173	histone kinase activity	-2.03571	3.62678	3.22717	-0.911783
GO:0015297	antiporter activity	-2.01082	1.93428	2.72565	-0.888088
