# Supplementary material for: Integrated bioinformatics analysis and experimental validation reveal ISG20 as a novel prognostic indicator expressed on M2 macrophage in glioma
Source: BMC Cancer. 2023 Jun 28;23:596. doi: 10.1186/s12885-023-11057-0 (PMC10303331; doi:10.1186/s12885-023-11057-0)
Supplement: Supplementary file 8 — Additional file 8. Table S8 [file 12885_2023_11057_MOESM8_ESM.xlsx]

## Sheet: _FINAL_GO
Table S8. Significant enriched KEGG terms by the differential expressed genes between ISG20 low and high subgroups
KEGG terms	Description	Log10 P-value	Enrichment	Z-score	Log10 q-value
hsa04080	Neuroactive ligand-receptor interaction	-28.8996	3.36629	13.908	-26.3605
hsa05033	Nicotine addiction	-20.5693	8.12398	13.8441	-18.3313
hsa04514	Cell adhesion molecules	-20.0831	4.20609	12.0466	-18.0212
hsa04145	Phagosome	-17.3406	3.89401	10.9835	-15.4035
hsa05416	Viral myocarditis	-17.1017	5.99627	11.8953	-15.2616
hsa04640	Hematopoietic cell lineage	-17.0052	4.68917	11.2897	-15.2443
hsa05150	Staphylococcus aureus infection	-16.6961	4.71481	11.194	-15.0021
hsa05323	Rheumatoid arthritis	-16.3877	4.74211	11.0982	-14.7517
hsa05140	Leishmaniasis	-15.9846	5.12459	11.1277	-14.3997
hsa04512	ECM-receptor interaction	-15.5828	4.74778	10.8112	-14.0501
hsa04940	Type I diabetes mellitus	-15.5478	6.74749	11.581	-14.0501
hsa04060	Cytokine-cytokine receptor interaction	-15.5053	2.83257	9.71243	-14.0454
hsa04610	Complement and coagulation cascades	-15.2755	4.77881	10.7127	-13.8504
hsa05330	Allograft rejection	-14.8928	7.0245	11.4106	-13.4998
hsa05332	Graft-versus-host disease	-14.714	6.63182	11.215	-13.351
hsa04020	Calcium signaling pathway	-14.1049	2.94978	9.31209	-12.77
hsa04672	Intestinal immune network for IgA production	-13.754	5.92127	10.5865	-12.4646
hsa04724	Glutamatergic synapse	-13.7485	3.97037	9.7568	-12.4646
hsa05152	Tuberculosis	-13.301	3.2238	9.1887	-12.0407
hsa04727	GABAergic synapse	-12.883	4.30323	9.58293	-11.6449
hsa05166	Human T-cell leukemia virus 1 infection	-12.86	2.92756	8.85136	-11.6432
hsa05144	Malaria	-12.4744	5.57073	9.93239	-11.2778
hsa05202	Transcriptional misregulation in cancer	-12.0317	3.00665	8.58751	-10.8544
hsa04510	Focal adhesion	-11.882	2.94473	8.49435	-10.7232
hsa05032	Morphine addiction	-11.7821	4.08112	9.03875	-10.6545
hsa05320	Autoimmune thyroid disease	-11.7786	5.25541	9.52103	-10.6545
hsa04713	Circadian entrainment	-10.928	3.82868	8.56824	-9.82026
hsa04380	Osteoclast differentiation	-10.588	3.35477	8.19783	-9.49613
hsa04061	Viral protein interaction with cytokine and cytokine receptor	-10.5311	3.71382	8.34689	-9.45439
hsa05410	Hypertrophic cardiomyopathy	-10.4174	3.86856	8.36868	-9.35547
hsa04723	Retrograde endocannabinoid signaling	-10.3836	3.13667	8.00127	-9.33584
hsa04024	cAMP signaling pathway	-10.2338	2.67824	7.68896	-9.19991
hsa05310	Asthma	-10.2086	6.36441	9.17591	-9.18808
hsa04010	MAPK signaling pathway	-10.0385	2.40798	7.44936	-9.0309
hsa04612	Antigen processing and presentation	-9.87099	4.01735	8.19329	-8.87598
hsa05145	Toxoplasmosis	-9.76308	3.41953	7.87718	-8.78031
hsa05414	Dilated cardiomyopathy	-9.6319	3.62678	7.91542	-8.66102
hsa05169	Epstein-Barr virus infection	-9.61633	2.70033	7.44544	-8.65704
hsa04659	Th17 cell differentiation	-9.55799	3.43872	7.79607	-8.60997
hsa05412	Arrhythmogenic right ventricular cardiomyopathy	-9.26055	3.9188	7.87459	-8.32354
hsa05322	Systemic lupus erythematosus	-9.14543	3.07209	7.43674	-8.21914
hsa05142	Chagas disease	-8.91953	3.41344	7.49712	-8.0037
hsa05205	Proteoglycans in cancer	-8.88086	2.6042	7.07683	-7.97525
hsa04726	Serotonergic synapse	-8.79522	3.22941	7.35513	-7.90284
hsa04911	Insulin secretion	-8.7887	3.64365	7.53868	-7.90284
hsa04658	Th1 and Th2 cell differentiation	-8.74385	3.53217	7.46916	-7.86753
hsa05133	Pertussis	-8.66079	3.81766	7.55207	-7.79381
hsa04721	Synaptic vesicle cycle	-8.39642	3.71977	7.38524	-7.53858
hsa04151	PI3K-Akt signaling pathway	-8.34853	2.13099	6.5727	-7.49965
hsa04974	Protein digestion and absorption	-8.16433	3.26762	7.07871	-7.32422
hsa05200	Pathways in cancer	-8.03569	1.87964	6.27955	-7.20418
hsa05321	Inflammatory bowel disease	-7.96159	3.92808	7.25656	-7.13852
hsa04650	Natural killer cell mediated cytotoxicity	-7.86084	2.92357	6.77503	-7.04604
hsa05164	Influenza A	-7.84583	2.64691	6.6317	-7.03915
hsa05143	African trypanosomiasis	-7.70778	5.01868	7.51058	-6.90906
hsa05146	Amoebiasis	-7.6425	3.18588	6.79021	-6.85161
hsa04668	TNF signaling pathway	-7.2749	3.00504	6.52775	-6.4917
hsa04728	Dopaminergic synapse	-7.2188	2.8135	6.41179	-6.44315
hsa05165	Human papillomavirus infection	-7.16972	2.06869	6.00318	-6.40149
hsa04929	GnRH secretion	-6.64693	3.62678	6.45948	-5.886
hsa04933	AGE-RAGE signaling pathway in diabetic complications	-6.63173	3.01748	6.20516	-5.87799
hsa04725	Cholinergic synapse	-6.61427	2.87575	6.1341	-5.86758
hsa04670	Leukocyte transendothelial migration	-6.52884	2.85052	6.07842	-5.7891
hsa04742	Taste transduction	-6.17852	3.10385	5.99937	-5.44562
hsa05170	Human immunodeficiency virus 1 infection	-6.12717	2.2445	5.58361	-5.401
hsa04062	Chemokine signaling pathway	-5.98586	2.29696	5.53586	-5.26633
hsa04064	NF-kappa B signaling pathway	-5.71707	2.78983	5.61437	-5.00407
hsa05417	Lipid and atherosclerosis	-5.55466	2.1592	5.23783	-4.84809
hsa05163	Human cytomegalovirus infection	-5.44076	2.11481	5.15396	-4.74054
hsa05031	Amphetamine addiction	-5.42087	3.19577	5.60701	-4.72689
hsa04930	Type II diabetes mellitus	-5.39873	3.78446	5.8033	-4.71092
hsa04613	Neutrophil extracellular trap formation	-5.25289	2.19897	5.09073	-4.57115
hsa04621	NOD-like receptor signaling pathway	-5.16492	2.2076	5.04526	-4.48916
hsa04115	p53 signaling pathway	-5.02951	3.02066	5.30766	-4.35966
hsa05162	Measles	-4.73565	2.33784	4.8544	-4.07739
hsa05418	Fluid shear stress and atherosclerosis	-4.73565	2.33784	4.8544	-4.07739
hsa04750	Inflammatory mediator regulation of TRP channels	-4.60707	2.60536	4.88781	-3.95449
hsa04360	Axon guidance	-4.46595	2.10433	4.58849	-3.81897
hsa04926	Relaxin signaling pathway	-4.44838	2.33913	4.68027	-3.80694
hsa04720	Long-term potentiation	-4.4108	2.94473	4.8933	-3.77481
hsa04657	IL-17 signaling pathway	-4.39331	2.59276	4.74914	-3.76272
hsa05171	Coronavirus disease - COVID-19	-4.37849	1.95096	4.46481	-3.75323
hsa05340	Primary immunodeficiency	-4.27887	3.66495	5.04752	-3.66375
hsa04810	Regulation of actin cytoskeleton	-4.27855	1.96977	4.4126	-3.66375
hsa04620	Toll-like receptor signaling pathway	-4.189	2.45505	4.56422	-3.58012
hsa04110	Cell cycle	-4.1847	2.30272	4.49952	-3.58012
hsa05134	Legionellosis	-4.15875	3.05413	4.76649	-3.55919
hsa04261	Adrenergic signaling in cardiomyocytes	-4.11453	2.1664	4.3974	-3.51993
hsa04310	Wnt signaling pathway	-4.04322	2.08485	4.31675	-3.45353
hsa05135	Yersinia infection	-3.98876	2.20254	4.33182	-3.40392
hsa04921	Oxytocin signaling pathway	-3.90895	2.11013	4.24098	-3.32892
hsa04371	Apelin signaling pathway	-3.88138	2.17085	4.24848	-3.30609
hsa04540	Gap junction	-3.82501	2.50577	4.34368	-3.25442
hsa05030	Cocaine addiction	-3.71984	3.07906	4.4724	-3.15389
hsa04925	Aldosterone synthesis and secretion	-3.64243	2.36851	4.16667	-3.08108
hsa04015	Rap1 signaling pathway	-3.58222	1.87902	3.92505	-3.02541
hsa05132	Salmonella infection	-3.39731	1.77115	3.75197	-2.845
hsa04390	Hippo signaling pathway	-3.38747	1.99588	3.84161	-2.83962
hsa04961	Endocrine and other factor-regulated calcium reabsorption	-3.35544	2.84668	4.13175	-2.812
hsa04730	Long-term depression	-3.32998	2.70799	4.06647	-2.79522
hsa04978	Mineral absorption	-3.32998	2.70799	4.06647	-2.79522
hsa04935	Growth hormone synthesis, secretion and action	-3.30682	2.14559	3.84488	-2.77635
hsa05167	Kaposi sarcoma-associated herpesvirus infection	-3.22256	1.85452	3.66644	-2.69632
hsa04934	Cushing syndrome	-3.11672	1.94676	3.62866	-2.59467
hsa05222	Small cell lung cancer	-3.10905	2.27068	3.74814	-2.59116
hsa04270	Vascular smooth muscle contraction	-2.964	1.99202	3.53397	-2.45023
hsa00770	Pantothenate and CoA biosynthesis	-2.86149	3.86856	4.03783	-2.3518
hsa04630	JAK-STAT signaling pathway	-2.82865	1.86264	3.38049	-2.323
hsa04611	Platelet activation	-2.68344	1.96548	3.30804	-2.18179
hsa00910	Nitrogen metabolism	-2.66023	4.09613	3.92093	-2.16255
hsa04936	Alcoholic liver disease	-2.62228	1.87979	3.2268	-2.12853
hsa04964	Proximal tubule bicarbonate reclamation	-2.60404	3.53217	3.73031	-2.11418
hsa04914	Progesterone-mediated oocyte maturation	-2.57956	2.04806	3.25571	-2.09356
hsa00760	Nicotinate and nicotinamide metabolism	-2.54551	2.90142	3.50519	-2.06334
hsa04260	Cardiac muscle contraction	-2.53904	2.13438	3.25363	-2.06066
hsa04014	Ras signaling pathway	-2.52201	1.65081	3.05559	-2.04739
hsa05235	PD-L1 expression and PD-1 checkpoint pathway in cancer	-2.43668	2.08642	3.15178	-1.96579
hsa04218	Cellular senescence	-2.41217	1.78549	3.02031	-1.94498
hsa04072	Phospholipase D signaling pathway	-2.39036	1.80359	3.00922	-1.92683
hsa04970	Salivary secretion	-2.29084	2.01838	3.00393	-1.83095
hsa04530	Tight junction	-2.26368	1.71682	2.86942	-1.80739
hsa05017	Spinocerebellar ataxia	-2.2583	1.78549	2.8911	-1.80559
hsa04924	Renin secretion	-2.25453	2.18658	3.02999	-1.80536
hsa05130	Pathogenic Escherichia coli infection	-2.2231	1.64954	2.80856	-1.77745
hsa04350	TGF-beta signaling pathway	-2.19845	1.97544	2.90846	-1.75629
hsa05217	Basal cell carcinoma	-2.1596	2.21061	2.95359	-1.7209
hsa05219	Bladder cancer	-2.14432	2.54759	3.04485	-1.70905
hsa04660	T cell receptor signaling pathway	-2.12297	1.89708	2.81399	-1.69111
hsa00380	Tryptophan metabolism	-2.07336	2.48693	2.96102	-1.64487
hsa04114	Oocyte meiosis	-2.06692	1.77186	2.71858	-1.64487
hsa04666	Fc gamma R-mediated phagocytosis	-2.06668	1.91434	2.76959	-1.64487
hsa04927	Cortisol synthesis and secretion	-2.04995	2.14259	2.83164	-1.63145
hsa00360	Phenylalanine metabolism	-2.03571	3.62678	3.22717	-1.62048
hsa00240	Pyrimidine metabolism	-2.00774	2.20108	2.81142	-1.59577
